# Supplementary material
Source: MDPI journal article supplement (https://www.mdpi.com/2035-8377/14/1/21)
Supplement: s1 [file s1]

**Table S1.** Clinical characteristics of the cohort.

| Patient | Gender | Age of seizure onset (months) | 1 <sup>st</sup> MRI brain     | Age of 1 <sup>st</sup> MRI (months) | 2 <sup>nd</sup> MRI brain     | Age of 2 <sup>nd</sup> MRI (years) | Seizure outcome | Current ASMs | Development outcome | Clinical diagnosis / Seizure type | Consanguinity | Similar cases in the family |
|---------|--------|-------------------------------|-------------------------------|-------------------------------------|-------------------------------|------------------------------------|-----------------|--------------|---------------------|-----------------------------------|---------------|-----------------------------|
| 1.      | M      | 3 months                      | Normal                        | 3                                   | Normal                        | 2                                  | Controlled      | 3            | GDD                 | LGS                               | Yes           | Yes                         |
| 2.      | M      | 7                             | Normal                        | 2                                   | Normal                        | 2                                  | Controlled      | 2            | Normal              | Generalized                       | No            | No                          |
| 3.      | M      | 2                             | Normal                        | 1                                   | Normal                        | 2                                  | Controlled      | 1            | Normal              | Generalized                       | No            | No                          |
| 4.      | F      | 7                             | Normal                        | 2                                   | Normal                        | 4                                  | Active epilepsy | 3            | GDD                 | LGS                               | Yes           | No                          |
| 5.      | F      | 6                             | Normal                        | 2                                   | Atrophy                       | 3                                  | Active epilepsy | 2            | GDD                 | Generalized                       | No            | No                          |
| 6.      | M      | 13                            | Heterotopia                   | 5                                   | Heterotopia                   | 2                                  | Active epilepsy | 2            | GDD                 | LGS                               | Yes           | No                          |
| 7.      | F      | 2                             | Dysgenesis of corpus callosum | 3                                   | Dysgenesis of corpus callosum | 2                                  | Active epilepsy | 3            | GDD                 | LGS                               | Yes           | Yes                         |
| 8.      | F      | 12                            | Hydrocephalus                 | 3                                   | Hydrocephalus                 | 2                                  | Active epilepsy | 2            | GDD                 | Focal                             | Yes           | No                          |
| 9.      | M      | 6                             | Hemimegalencephaly            | 2                                   | Hemimegalencephaly            | 2                                  | Active epilepsy | 4            | GDD                 | Focal                             | No            | No                          |
| 10      | F      | 6                             | Hydrocephalus                 | 2                                   | Hydrocephalus                 | 2                                  | Active epilepsy | 3            | GDD                 | Focal                             | No            | No                          |
| 11      | M      | 7                             | Cobblestone lissencephaly     | 1                                   | cobblestone lissencephaly     | 3                                  | Active epilepsy | 4            | GDD                 | LGS                               | Yes           | No                          |
| 12      | M      | 8                             | Basal ganglia enhancement     | 5                                   | Basal ganglia enhancement     | 2                                  | Active epilepsy | 1            | GDD                 | Generalized                       | Yes           | No                          |

|    |   |    |                                 |   |                                           |   |                 |   |      |             |     |    |
|----|---|----|---------------------------------|---|-------------------------------------------|---|-----------------|---|------|-------------|-----|----|
| 13 | F | 4  | Normal                          | 4 | Delayed myelination                       | 3 | Active epilepsy | 2 | GDD  | Generalized | Yes | No |
| 14 | F | 7  | Hydrocephalus                   | 6 | Hydrocephalus                             | 2 | Active epilepsy | 2 | ADHD | Generalized | No  | No |
| 15 | F | 9  | Normal                          | 3 | Delayed myelination                       | 2 | Active epilepsy | 2 | ASD  | Generalized | Yes | No |
| 16 | F | 10 | Thinning of the corpus callosum | 2 | Thinning of the corpus callosum           | 2 | Active epilepsy | 2 | GDD  | LGS         | Yes | No |
| 17 | M | 4  | Normal                          | 4 | PVL                                       | 2 | Controlled      | 2 | GDD  | Focal       | No  | No |
| 18 | M | 4  | Normal                          | 3 | PVL                                       | 2 | Active epilepsy | 3 | GDD  | Focal       | No  | No |
| 19 | F | 3  | Normal                          | 2 | White matter changes                      | 4 | Active epilepsy | 2 | GDD  | Generalized | Yes | No |
| 20 | M | 4  | Normal                          | 3 | White matter changes                      | 3 | Active epilepsy | 3 | GDD  | Generalized | Yes | No |
| 21 | F | 7  | Delayed myelination             | 3 | Delayed myelination                       | 3 | Active epilepsy | 1 | GDD  | LGS         | No  | No |
| 22 | F | 6  | Delayed myelination             | 3 | Delayed myelination                       | 2 | Controlled      | 2 | GDD  | Focal       | No  | No |
| 23 | F | 4  | Normal                          | 2 | Dilation of cerebral ventricles (atrophy) | 4 | Active epilepsy | 2 | GDD  | Generalized | No  | No |
| 24 | M | 8  | Hypoxic ischemic encephalopathy | 1 | Hypoxic ischemic encephalopathy           | 2 | Active epilepsy | 3 | GDD  | LGS         | No  | No |
| 25 | F | 5  | Normal                          | 2 | Heterotopia                               | 2 | Active epilepsy | 3 | GDD  | LGS         | Yes | No |
| 26 | M | 9  | Hypoxic ischemic encephalopathy | 3 | Hypoxic ischemic encephalopathy           | 2 | Controlled      | 2 | GDD  | LGS         | Yes | No |

|    |   |    |                                 |   |                                 |   |                 |   |                    |             |     |    |
|----|---|----|---------------------------------|---|---------------------------------|---|-----------------|---|--------------------|-------------|-----|----|
| 27 | M | 11 | Dysgenesis of corpus callosum   | 3 | Dysgenesis of corpus callosum   | 2 | Active epilepsy | 3 | GDD                | Generalized | Yes | No |
| 28 | M | 12 | Normal                          | 4 | Hypoxic ischemic encephalopathy | 3 | Controlled      | 1 | Speech delay       | Generalized | Yes | No |
| 29 | F | 3  | Delayed myelination             | 3 | Delayed myelination             | 2 | Controlled      | 2 | Speech delay       | LGS         | Yes | No |
| 30 | F | 7  | Thinning of the corpus callosum | 3 | Thinning of the corpus callosum | 1 | Active epilepsy | 2 | Intellectual delay | Focal       | Yes | No |
| 31 | M | 6  | Normal                          | 3 | Normal                          | 2 | Active epilepsy | 3 | Intellectual delay | Focal       | Yes | No |
| 32 | F | 4  | Dysgenesis of corpus callosum   | 4 | Dysgenesis of corpus callosum   | 2 | Controlled      | 2 | Intellectual delay | Generalized | Yes | No |
| 33 | F | 5  | Normal                          | 5 | Normal                          | 2 | Active epilepsy | 3 | Speech delay       | Generalized | No  | No |
| 34 | F | 4  | Hypoxic ischemic encephalopathy | 1 | Hypoxic ischemic encephalopathy | 3 | Active epilepsy | 3 | Speech delay       | Focal       | Yes | No |
| 35 | F | 8  | Hypoxic ischemic encephalopathy | 1 | Hypoxic ischemic encephalopathy | 3 | Controlled      | 1 | Intellectual delay | Generalized | No  | No |
| 36 | M | 3  | Normal                          | 2 | Delayed myelination             | 2 | Active epilepsy | 2 | Speech delay       | Generalized | Yes | No |
| 37 | F | 10 | Normal                          | 2 | Hypoxic ischemic encephalopathy | 1 | Active epilepsy | 3 | GDD                | Generalized | No  | No |
| 38 | F | 9  | Normal                          | 1 | Thinning of the corpus callosum | 2 | Active epilepsy | 3 | GDD                | Generalized | Yes | No |
| 39 | F | 6  | Heterotopia                     | 3 | Heterotopia                     | 2 | Active epilepsy | 3 | GDD                | Generalized | Yes | No |
| 40 | M | 4  | Thinning of the corpus callosum | 3 | Thinning of the corpus callosum | 3 | Controlled      | 3 | Intellectual delay | Generalized | No  | No |
| 41 | F | 7  | Normal                          | 1 | Normal                          | 3 | Active          | 3 | Speech             | Generalized | Yes | No |

|    |   |   |                                 |   |                                 |   |                 |   |                    |             |     |    |
|----|---|---|---------------------------------|---|---------------------------------|---|-----------------|---|--------------------|-------------|-----|----|
|    |   |   |                                 |   |                                 |   | epilepsy        |   | delay              | zed         |     |    |
| 42 | M | 3 | Normal                          | 1 | Normal                          | 3 | Active epilepsy | 2 | Normal             | Focal       | No  | No |
| 43 | M | 5 | Normal                          | 2 | Cortical tubers                 | 2 | Active epilepsy | 2 | Intellectual delay | Generalized | Yes | No |
| 44 | F | 3 | Hypoxic ischemic encephalopathy | 3 | Hypoxic ischemic encephalopathy | 3 | Active epilepsy | 2 | GDD                | LGS         | No  | No |
| 45 | M | 7 | Normal                          | 4 | Meningitis sequelae             | 1 | Controlled      | 2 | Intellectual delay | LGS         | Yes | No |
| 46 | F | 5 | Dilation of cerebral ventricles | 1 | Dilation of cerebral ventricles | 2 | Active epilepsy | 2 | Intellectual delay | Generalized | Yes | No |
| 47 | M | 4 | Hypoxic ischemic encephalopathy | 2 | Hypoxic ischemic encephalopathy | 2 | Active epilepsy | 3 | GDD                | LGS         | No  | No |
| 48 | F | 4 | Normal                          | 5 | Normal                          | 2 | Controlled      | 2 | Normal             | Generalized | Yes | No |
| 49 | F | 3 | Normal                          | 3 | Cortical tubers                 | 3 | Active epilepsy | 2 | ADHD/ASD           | Focal       | No  | No |
| 50 | F | 6 | Normal                          | 1 | Dilation of cerebral ventricles | 4 | Controlled      | 2 | Normal             | Focal       | Yes | No |
| 51 | F | 1 | Delayed myelination             | 2 | Delayed myelination             | 3 | Active epilepsy | 2 | Intellectual delay | Generalized | Yes | No |
| 52 | M | 6 | Thinning of the corpus callosum | 4 | Thinning of the corpus callosum | 3 | Controlled      | 2 | Speech delay       | Generalized | No  | No |
| 53 | M | 8 | Normal                          | 1 | Delayed myelination             | 4 | Active epilepsy | 3 | Intellectual delay | Focal       | Yes | No |
| 54 | F | 5 | Normal                          | 5 | Hypoxic ischemic encephalopathy | 2 | Active epilepsy | 3 | Intellectual delay | LGS         | Yes | No |
| 55 | F | 4 | Delayed                         | 3 | Delayed                         | 2 | Active          | 2 | GDD                | Generalized | No  | No |

|    |   |   |             |   |                                       |   |                    |   |                 |                 |    |    |
|----|---|---|-------------|---|---------------------------------------|---|--------------------|---|-----------------|-----------------|----|----|
|    |   |   | myelination |   | myelination                           |   | epilepsy           |   |                 | zed             |    |    |
| 56 | M | 3 | Normal      | 2 | Hypoxic<br>ischemic<br>encephalopathy | 2 | Active<br>epilepsy | 3 | Speech<br>delay | Generali<br>zed | No | No |

LGS: Lennox-Gastaut syndrome

ASM: antiseizure medications

GDD: global developmental delay.

PVL: periventricular leukomalacia

ADHD: Attention deficit hyperactivity disorder

ASD: autism spectrum disorder
